# Supplementary material for: Theoretical design of transition metal-doped TiO2 for the selective catalytic reduction of NO with NH3 by DFT calculations
Source: Royal Society of Chemistry journal article supplement (doi:10.1039/d1cy02214h), 2022-01-01
Supplement: d1cy02214h1.pdf [file d1cy02214h1.pdf]

## Theoretical Design of Transition Metal-Doped TiO<sub>2</sub> for the Selective Catalytic Reduction of NO with NH<sub>3</sub> by DFT Calculations

Huiling Zheng,<sup>a</sup> Renjie Li,<sup>a</sup> Chengming Zhong,<sup>a</sup> Zhi Li,<sup>a</sup> Yikun Kang,<sup>a</sup> Jianlin Deng,<sup>a</sup>

Weiyu Song,<sup>a,\*</sup> Zhen Zhao,<sup>a,b,\*</sup>

<sup>a</sup> State Key Laboratory of Heavy Oil Processing, College of Science, China University  
of Petroleum-Beijing, Chang Ping District, Beijing 102249, China

<sup>b</sup> Institute of Catalysis for Energy and Environment, Shenyang Normal University,  
Shenyang 110034, China

\* Corresponding Authors

E-mail: [songwy@cup.edu.cn](mailto:songwy@cup.edu.cn) (W. Y. Song);

[zhenzhao@cup.edu.cn](mailto:zhenzhao@cup.edu.cn) (Z. Zhao); [zhaozhen1586@163.com](mailto:zhaozhen1586@163.com) (Z. Zhao);

Telephone: 86-10-89731586 (Z. Zhao)

## Supporting Information

**Table S1.** Imaginary frequencies for transition states of every elementary step on M-TiO<sub>2</sub> (M=V, Cr, Mn, Fe, Co, Mo, and Ce) and TiO<sub>2</sub>.

| /cm <sup>-1</sup> | TS1     | TS2   | TS3    | TS4    | TS5    | TS6    | TS7     | TS8    | TS9    |
|-------------------|---------|-------|--------|--------|--------|--------|---------|--------|--------|
| TiO <sub>2</sub>  | 502.62  | /     | 148.61 | /      | /      | /      | /       | /      | 90.49  |
| V                 | 768.60  | /     | 605.81 | /      | /      | /      | 512.90  | /      | 111.44 |
| Cr                | 746.89  | /     | 312.28 | /      | 31.86  | 211.54 | 180.16  | /      | 148.06 |
| Mn                | 948.90  | /     | 610.12 | /      | /      | /      | 197.28  | /      | 226.32 |
| Fe                | 945.09  | /     | /      | 32.43  | 83.54  | 118.41 | 1343.86 | /      | 247.50 |
| Co                | 941.49  | /     | /      | 37.46  | /      | 122.39 | /       | /      | 157.93 |
| Mo                | 382.51  | 38.21 | 705.82 | 138.36 | 119.14 | 512.14 | 1050.20 | 109.13 | 663.71 |
| Ce                | 1366.40 | /     | 181.45 | 109.08 | 623.00 | /      | /       | /      | 103.95 |

**Table S2.** Imaginary frequencies for transition states of TS1 (NH<sub>3</sub> dissociation) and TS7 (NH<sub>2</sub> dissociation) on M-TiO<sub>2</sub> (M = 3d and 4d transition metals and Ce).

| /cm <sup>-1</sup> | Sc      | TiO <sub>2</sub> | V      | Cr     | Mn     | Fe      | Co     | Ni      | Cu      | Zn      |
|-------------------|---------|------------------|--------|--------|--------|---------|--------|---------|---------|---------|
| TS1               | 1341.39 | 502.62           | 768.60 | 746.89 | 948.90 | 945.09  | 941.49 | 1062.70 | 1160.75 | 1093.17 |
| TS7               | 175.36  | /                | 512.90 | 180.16 | 197.28 | 1343.86 | /      | 100.74  | 1033.58 | /       |

  

| /cm <sup>-1</sup> | Y       | Zr     | Nb     | Mo      | Tc      | Ru      | Rh     | Pd      | Ag      | Cd      | Ce      |
|-------------------|---------|--------|--------|---------|---------|---------|--------|---------|---------|---------|---------|
| TS1               | 1408.07 | 265.00 | 557.22 | 382.51  | 869.59  | 1085.76 | 933.50 | 1244.73 | 1169.61 | 1222.32 | 1366.40 |
| TS7               | 199.44  | /      | 536.85 | 1050.20 | 1280.93 | 165.66  | 172.81 | 616.99  | /       | 1060.48 | /       |

**Table S3.** Reaction energies and energy barriers of every step for N<sub>2</sub> formation M-TiO<sub>2</sub> (M=V, Cr, Mn, Fe, Co, Mo, and Ce) and TiO<sub>2</sub> (correspond to Fig. 3-4).

| /eV                 | TiO <sub>2</sub> | V     | Cr    | Mn    | Fe    | Co    | Mo    | Ce    |
|---------------------|------------------|-------|-------|-------|-------|-------|-------|-------|
| NH <sub>3</sub> *   | -1.16            | -1.24 | -1.28 | -1.38 | -0.84 | -0.93 | -1.5  | -0.88 |
| TS1                 | 1.31             | 1.43  | 1.34  | 0.97  | 1.35  | 0.65  | 1.39  | 1.26  |
| NH <sub>2</sub> *   | 0.99             | 0.93  | 0.64  | 0.66  | 1.06  | 0.18  | 0.73  | 0.87  |
| TS2                 | /                | /     | /     | /     | /     | /     | 0.087 | /     |
| NH <sub>2</sub> NO  | -1.03            | -1.37 | -1.98 | -2.18 | -2.81 | -1.8  | -0.69 | -1.65 |
| NH <sub>2</sub> NO* | -0.44            | -0.52 | -0.53 | -0.33 | -0.47 | -0.49 | -0.51 | -0.39 |
| TS3                 | 0.61             | 0.41  | 0.44  | 0.53  | /     | /     | 0.55  | 0.62  |
| HNNOH               | 0.57             | 0.37  | 0.44  | 0.4   | 0.4   | 0.52  | 0.5   | 0.52  |
| TS4                 | /                | /     | /     | /     | 0.43  | 0.43  | 0.68  | 0.75  |
| HNNOH'              | 0.85             | 0.73  | 0.78  | 0.29  | 0.42  | 0.42  | 0.63  | 0.2   |
| TS5                 | /                | /     | 0.004 | /     | 0.014 | /     | 0.29  | 0.2   |
| N <sub>2</sub>      | -2.51            | -2.92 | -2.74 | -1.85 | -2.44 | -2.23 | -3.13 | -2.01 |
| TS6                 | /                | /     | 0.007 | /     | 0.01  | 0.022 | 0.067 | /     |
| H <sub>2</sub> O    | -0.65            | /     | -0.19 | -0.82 | -0.25 | -0.47 | -0.06 | -0.45 |
| H*                  | 0.8              | 0.87  | 0.94  | 0.71  | 0.69  | 0.68  | 1.13  | 1.05  |

**Table S4.** Reaction energies and energy barriers of every step for N<sub>2</sub>O formation on M-TiO<sub>2</sub> (M = 3d and 4d transition metals and Ce) (correspond to Fig. 5).

| /eV              | NH <sub>3</sub> * | TS1  | NH <sub>2</sub> * | TS7  | NH*  | TS8  | NHNO* | TS9  | N <sub>2</sub> O |
|------------------|-------------------|------|-------------------|------|------|------|-------|------|------------------|
| TiO <sub>2</sub> | -1.16             | 1.31 | 0.99              | /    | 1.56 | /    | -2.25 | 0.27 | -0.08            |
| V                | -1.24             | 1.43 | 0.93              | 1.04 | 0.96 | /    | -1.84 | 0.03 | -0.19            |
| Cr               | -1.28             | 1.34 | 0.64              | 1.63 | 1.07 | /    | -2.81 | 0.74 | -0.18            |
| Mn               | -1.38             | 0.97 | 0.66              | 1.33 | 0.97 | /    | -3.04 | 0.19 | -0.73            |
| Fe               | -0.84             | 1.35 | 1.06              | 1.14 | 0.36 | /    | -2.84 | 0.31 | -0.79            |
| Co               | -0.93             | 0.65 | 0.18              | /    | 0.76 | /    | -2.92 | 0.56 | -0.50            |
| Mo               | -1.50             | 1.39 | 0.73              | 1.29 | 0.73 | 0.04 | -1.40 | 0.73 | 0.29             |
| Ce               | -0.88             | 1.26 | 0.87              | /    | 1.42 | /    | -3.71 | 0.81 | 0.68             |

**Table S5.** Reaction energies and energy barriers of NH<sub>3</sub> and NH<sub>2</sub> dissociation on M-TiO<sub>2</sub> (M = 3d and 4d transition metals and Ce) (correspond to Fig. 7).

| /eV              | NH <sub>3</sub> * | TS1(E <sub>app-1</sub> ) | NH <sub>2</sub> * | TS7  | NH*   | E <sub>app-2</sub> |
|------------------|-------------------|--------------------------|-------------------|------|-------|--------------------|
| Sc               | -1.04             | 0.89                     | -0.27             | 1.48 | 1.44  | 1.21               |
| TiO <sub>2</sub> | -1.16             | 1.31                     | 0.99              | /    | 1.53  | 2.55               |
| V                | -1.24             | 1.43                     | 0.93              | 1.04 | 0.96  | 1.97               |
| Cr               | -1.28             | 1.34                     | 0.64              | 1.63 | 1.07  | 2.27               |
| Mn               | -1.38             | 0.97                     | 0.66              | 1.33 | 0.97  | 1.99               |
| Fe               | -0.84             | 1.35                     | 1.06              | 1.14 | 0.36  | 2.20               |
| Co               | -0.93             | 0.65                     | 0.18              | /    | 0.76  | 0.94               |
| Ni               | -1.22             | 0.68                     | 0.44              | 0.27 | 0.09  | 0.71               |
| Cu               | -1.03             | 0.68                     | -0.06             | 0.40 | 0.14  | 0.68               |
| Zn               | -0.77             | 0.62                     | -0.10             | 0    | -0.30 | 0.62               |
| Y                | -1.01             | 0.71                     | -0.12             | 1.05 | 0.98  | 0.92               |
| Zr               | -1.41             | 1.26                     | 0.93              | /    | 2.00  | 2.93               |
| Nb               | -0.59             | 1.25                     | 0.88              | 1.06 | 0.82  | 1.94               |
| Mo               | -1.50             | 1.39                     | 0.73              | 1.29 | 0.73  | 2.02               |
| Tc               | -1.63             | 1.23                     | 0.82              | 1.02 | 0.72  | 1.84               |
| Ru               | -1.88             | 1.25                     | 0.70              | 0.79 | 0.76  | 1.49               |
| Rh               | -1.89             | 1.12                     | 0.33              | 1.29 | 1.28  | 1.62               |
| Pd               | -2.00             | 0.90                     | 0.42              | 1.45 | 1.38  | 1.87               |
| Ag               | -0.88             | 0.75                     | 0.16              | /    | 0.44  | 0.75               |
| Cd               | -0.76             | 0.72                     | -0.15             | 0.42 | -0.1  | 0.72               |
| Ce               | -0.88             | 1.26                     | 0.87              | /    | 1.42  | 2.29               |

**Table S6.** Oxygen vacancy formation energy of  $O_{2c-1}$  ( $E_{VO-1}$ ),  $O_{2c-2}$  ( $E_{VO-1}$ ), and the sum of  $O_{2c-1}$  and  $O_{2c-2}$  ( $E_{VO-1}$ ), doping energy, Bader charge transfer of doping metal,  $O_{2c-1}$  and  $O_{2c-2}$  after doping on  $M-TiO_2$  ( $M = 3d$  and  $4d$  transition metals and Ce) (correspond to Fig. 9-10).

| /eV | $E_{VO-1}$ | Doping energy | Bader charge transfer of doping metal/ $e$ | Bader charge transfer of $O_{2c-1}/e$ | Bader charge transfer of $O_{2c-2}/e$ | $E_{VO-2}$ | $E_{VO-sum}$ |
|-----|------------|---------------|--------------------------------------------|---------------------------------------|---------------------------------------|------------|--------------|
| Sc  | 1.19       | -0.25         | -2.17                                      | 1.01                                  | 0.9058                                | 1.48       | 2.67         |
| Ti  | 3.49       | 0             | -2.02                                      | 0.92                                  | 0.9196                                | 3.57       | 7.06         |
| V   | 2.8        | 2.06          | -1.91                                      | 0.86                                  | 0.9207                                | 3.44       | 6.24         |
| Cr  | 1.87       | 2.21          | -1.80                                      | 0.82                                  | 0.9178                                | 2.35       | 4.22         |
| Mn  | 0.6        | 5.09          | -1.76                                      | 0.85                                  | 0.9222                                | 2.04       | 2.64         |
| Fe  | 1.04       | 4.41          | -1.72                                      | 0.80                                  | 0.9215                                | 2.31       | 3.35         |
| Co  | 0.14       | 5.97          | -1.53                                      | 0.72                                  | 0.9124                                | 2.20       | 2.34         |
| Ni  | -0.94      | 6.90          | -1.31                                      | 0.63                                  | 0.9125                                | 0.29       | -0.7         |
| Cu  | -1.39      | 8.86          | -1.21                                      | 0.62                                  | 0.9082                                | -0.13      | -1.5         |
| Zn  | -1.67      | 8.83          | -1.29                                      | 0.59                                  | 0.9055                                | -0.26      | -1.9         |
| Y   | 1.06       | 0.60          | -2.27                                      | 1.05                                  | 0.9108                                | 1.43       | 2.49         |
| Zr  | 4.75       | -2.0          | -2.36                                      | 1.01                                  | 0.9228                                | 3.50       | 8.25         |
| Nb  | 4.60       | -2.82         | -2.78                                      | 1.03                                  | 0.9223                                | 3.44       | 8.04         |
| Mo  | 3.54       | 2.51          | -1.99                                      | 0.91                                  | 0.92                                  | 3.45       | 6.99         |
| Tc  | 3.75       | 1.22          | -1.79                                      | 0.86                                  | 0.9199                                | 3.45       | 7.20         |
| Ru  | 2.77       | 2.70          | -1.59                                      | 0.80                                  | 0.9178                                | 3.42       | 6.19         |
| Rh  | 1.89       | 4.45          | -1.42                                      | 0.72                                  | 0.9183                                | 2.56       | 4.45         |
| Pd  | 0.69       | 7.84          | -1.31                                      | 0.76                                  | 0.9172                                | 1.46       | 2.15         |
| Ag  | -0.56      | 10.44         | -1.18                                      | 0.63                                  | 0.9027                                | 0.69       | 0.13         |
| Cd  | -1.51      | 10.65         | -1.31                                      | 0.62                                  | 0.8954                                | -0.22      | -1.70        |
| Ce  | 2.28       | -1.43         | -2.32                                      | 0.96                                  | 0.9246                                | 3.45       | 5.73         |

**Table S7.** Electronic energies and Gibbs free energies (at 150 and 250 °C) for reaction energies and barriers of every step for N<sub>2</sub> formation on Mn-TiO<sub>2</sub> (correspond to Fig. 3-4).

| /eV                 | $\Delta E(\text{el})$ | $\Delta G(150^\circ\text{C})$ | $\Delta G(250^\circ\text{C})$ |
|---------------------|-----------------------|-------------------------------|-------------------------------|
| NH <sub>3</sub> *   | -1.38                 | -0.44                         | -0.50                         |
| TS1                 | 0.97                  | 0.85                          | 0.81                          |
| NH <sub>2</sub> *   | 0.66                  | 0.56                          | 0.55                          |
| TS2                 | /                     | /                             | /                             |
| NH <sub>2</sub> NO  | -2.18                 | -2.02                         | -2.05                         |
| NH <sub>2</sub> NO* | -0.33                 | -0.34                         | -0.36                         |
| TS3                 | 0.53                  | 0.47                          | 0.49                          |
| HNNOH               | 0.40                  | 0.41                          | 0.41                          |
| TS4                 | /                     | /                             | /                             |
| HNNOH'              | 0.29                  | 0.23                          | 0.21                          |
| TS5                 | /                     | /                             | /                             |
| N <sub>2</sub>      | -1.85                 | -1.98                         | -1.99                         |
| TS6                 | /                     | /                             | /                             |
| H <sub>2</sub> O    | -0.82                 | -0.77                         | -0.70                         |
| H*                  | 0.71                  | 0.14                          | 0.20                          |



**Table S8.** Electronic energies and free energies (at 150 and 250 °C) for reaction energies and barriers of every step for N<sub>2</sub>O formation on Mn-TiO<sub>2</sub> (correspond to Fig. 5).

| /eV                           | NH <sub>3</sub> * | TS1  | NH <sub>2</sub> * | TS7  | NH*  | TS8 | NHNO* | TS9  | N <sub>2</sub> O |
|-------------------------------|-------------------|------|-------------------|------|------|-----|-------|------|------------------|
| $\Delta E(\text{el})$         | -1.38             | 0.97 | 0.66              | 1.33 | 0.97 | /   | -3.04 | 0.19 | -0.73            |
| $\Delta G(150^\circ\text{C})$ | -0.44             | 0.85 | 0.56              | 1.26 | 0.89 | /   | -2.93 | 0.24 | -0.68            |
| $\Delta G(250^\circ\text{C})$ | -0.50             | 0.81 | 0.55              | 1.27 | 0.88 | /   | -2.98 | 0.24 | -0.69            |

**Table S9.** Electronic energies and free energies (at 150 and 250 °C) for reaction energies and barriers of every step for NH<sub>3</sub> and NH<sub>2</sub> dissociation on M-TiO<sub>2</sub> (M=V, Cr, Mn, Fe, Co, Mo, and Ce) and TiO<sub>2</sub> (correspond to Fig. 5).

|                  | /eV       | NH <sub>3</sub> | TS1(E <sub>app-1</sub> ) | NH <sub>2</sub> | TS7  | NH   | E <sub>app-2</sub> |
|------------------|-----------|-----------------|--------------------------|-----------------|------|------|--------------------|
| TiO <sub>2</sub> | ΔE(el)    | -1.16           | 1.31                     | 0.99            | /    | 1.53 | 2.55               |
|                  | ΔG(150°C) | -0.23           | 1.19                     | 1.03            | /    | 1.42 | 2.45               |
|                  | ΔG(250°C) | -0.28           | 1.19                     | 1.01            | /    | 1.41 | 2.42               |
| V                | ΔE(el)    | -1.24           | 1.43                     | 0.93            | 1.04 | 0.96 | 1.97               |
|                  | ΔG(150°C) | -0.33           | 1.33                     | 0.90            | 0.90 | 0.89 | 1.80               |
|                  | ΔG(250°C) | -0.39           | 1.35                     | 0.91            | 0.92 | 0.88 | 1.83               |
| Cr               | ΔE(el)    | -1.28           | 1.34                     | 0.64            | 1.63 | 1.07 | 2.27               |
|                  | ΔG(150°C) | -0.32           | 1.20                     | 0.53            | 1.61 | 0.98 | 2.14               |
|                  | ΔG(250°C) | -0.38           | 1.21                     | 0.52            | 1.63 | 0.97 | 2.15               |
| Mn               | ΔE(el)    | -1.38           | 0.97                     | 0.66            | 1.33 | 0.97 | 1.99               |
|                  | ΔG(150°C) | -0.44           | 0.85                     | 0.56            | 1.26 | 0.89 | 1.82               |
|                  | ΔG(250°C) | -0.50           | 0.81                     | 0.55            | 1.27 | 0.88 | 1.82               |
| Fe               | ΔE(el)    | -0.84           | 1.35                     | 1.06            | 1.14 | 0.36 | 2.20               |
|                  | ΔG(150°C) | 0.074           | 1.26                     | 0.96            | 1.15 | 0.32 | 2.11               |
|                  | ΔG(250°C) | 0.0073          | 1.29                     | 0.95            | 1.19 | 0.33 | 2.14               |
| Co               | ΔE(el)    | -0.93           | 0.65                     | 0.18            | /    | 0.76 | 0.94               |
|                  | ΔG(150°C) | -0.051          | 0.61                     | 0.21            | /    | 0.68 | 0.89               |
|                  | ΔG(250°C) | -0.12           | 0.64                     | 0.23            | /    | 0.69 | 0.92               |
| Mo               | ΔE(el)    | -1.50           | 1.39                     | 0.73            | 1.29 | 0.73 | 2.02               |
|                  | ΔG(150°C) | -0.56           | 1.28                     | 0.69            | 1.19 | 0.71 | 1.88               |
|                  | ΔG(250°C) | -0.62           | 1.29                     | 0.68            | 1.21 | 0.71 | 1.89               |
| Ce               | ΔE(el)    | -0.88           | 1.26                     | 0.87            | /    | 1.42 | 2.29               |
|                  | ΔG(150°C) | 0.060           | 1.10                     | 0.71            | /    | 1.43 | 2.14               |
|                  | ΔG(250°C) | 0.019           | 1.09                     | 0.67            | /    | 1.43 | 2.10               |
